# Supplementary material for: Identifying Plant Functional Traits of Weeds in Fields Planted with Glyphosate-Tolerant Maize for Preferable Weed Management Practices
Source: MDPI journal article supplement (doi:10.3390/agriculture14020223), 2024-01-30
Supplement: s1 [file s1]

Archive with 1 entries (1 files):
- agriculture-2721995-supplementary.pdf
