# Supplementary material for: Identifying Plant Functional Traits of Weeds in Fields Planted with Glyphosate-Tolerant Maize for Preferable Weed Management Practices
Source: MDPI journal article supplement (doi:10.3390/agriculture14020223), 2024-01-30
Supplement: s1 [file s1 › agriculture-2721995-supplementary.pdf]

## SUPPLEMENTARY MATERIALS

**Supplementary Table S1.** Indicator weed species with their functional traits in fields planted with herbicide tolerant (Glyphosate) maize.

| Acronym | Scientific Name                                 | Family         | Photosynthetic Pathway                | Carbon Storage in Reserve Organ      | Life Form                 | Growth Form           | Life Span           | Seed Size                |
|---------|-------------------------------------------------|----------------|---------------------------------------|--------------------------------------|---------------------------|-----------------------|---------------------|--------------------------|
| AMAVIR  | <i>Amaranthus viridis</i> L.                    | Amaranthaceae  | Photosynthetic pathway C <sub>4</sub> | Specialised carbon storage organs    | Therophyte life form      | Erect growth form     | Annual life span    | Seed size length <2mm    |
| ARGMEX  | <i>Argemone mexicana</i> L.                     | Papaveraceae   | Photosynthetic pathway C <sub>3</sub> | Specialised carbon storage organs    | Therophyte life form      | Rosette growth form   | Annual life span    | Seed size length <2mm    |
| ARIABY  | <i>Aristea abyssinica</i> Pax                   | Iridaceae      | Photosynthetic pathway C <sub>3</sub> | Specialised carbon storage organs    | Geophyte life form        | Tufted growth form    | Perennial life span | Seed size length 2- <4mm |
| BERONO  | <i>Berkheya onopordifolia</i> (DC.) O.Hoffm. Ex | Asteraceae     | Photosynthetic pathway C <sub>4</sub> | Specialised carbon storage organs    | Geophyte life form        | Erect growth form     | Perennial life span | Seed size length <2mm    |
| BIDBIP  | <i>Bidens bipinnata</i> L.                      | Asteraceae     | Photosynthetic pathway C <sub>3</sub> | Specialised carbon storage organs    | Therophyte life form      | Erect growth form     | Annual life span    | Seed size length >10mm   |
| BIDPIL  | <i>Bidens pilosa</i> L.                         | Asteraceae     | Photosynthetic pathway C <sub>3</sub> | Specialised carbon storage organs    | Therophyte life form      | Erect growth form     | Annual life span    | Seed size length >10mm   |
| BRODIA  | <i>Bromus diandrus</i> Roth                     | Poaceae        | Photosynthetic pathway C <sub>3</sub> | Specialised carbon storage organs    | Therophyte life form      | Tufted growth form    | Annual life span    | Seed size length >10mm   |
| BULHUM  | <i>Bulbostylis humilis</i> (Kunth) C.B.Clarke   | Cyperaceae     | Photosynthetic pathway C <sub>4</sub> | Specialised carbon storage organs    | Therophyte life form      | Tussock growth form   | Annual life span    | Seed size length <2mm    |
| CALSER  | <i>Callicoma serratifolia</i> Andrews           | Cunoniaceae    | Photosynthetic pathway CAM            | No specialised carbon storage organs | Phanerophyte life form    | Erect growth form     | Perennial life span | Seed size length <2mm    |
| CHAPRO  | <i>Chamaesyce prostrata</i> (Aiton) Small       | Euphorbiaceae  | Photosynthetic pathway C <sub>4</sub> | Specialised carbon storage organs    | Therophyte life form      | Creeper growth form   | Annual life span    | Seed size length <2mm    |
| CHAHED  | <i>Chascanum hederaceum</i> (Sond.) Moldenke    | Verbenaceae    | Photosynthetic pathway CAM            | No specialised carbon storage organs | Chamaephyte life form     | Erect growth form     | Perennial life span | Seed size length <2mm    |
| CHECAR  | <i>Chenopodium carinatum</i> R.Br.              | Chenopodiaceae | Photosynthetic pathway C <sub>3</sub> | Specialised carbon storage organs    | Therophyte life form      | Erect growth form     | Annual life span    | Seed size length 4-10mm  |
| CIRVUL  | <i>Cirsium vulgare</i> (Savi) Ten.              | Asteraceae     | Photosynthetic pathway C <sub>3</sub> | Specialised carbon storage organs    | Hemicryptophyte life form | Erect growth form     | Biennial life span  | Seed size length 4-10mm  |
| CONBON  | <i>Conyza bonariensis</i> (L.) Cronquist        | Asteraceae     | Photosynthetic pathway C <sub>4</sub> | Specialised carbon storage organs    | Therophyte life form      | Rosette growth form   | Annual life span    | Seed size length <2mm    |
| COTHET  | <i>Cotula heterocarpa</i> DC.                   | Asteraceae     | Photosynthetic pathway CAM            | No specialised carbon storage organs | Chamaephyte life form     | Erect growth form     | Perennial life span | Seed size length <2mm    |
| CYPCON  | <i>Cyperus congestus</i> Vahl                   | Cyperaceae     | Photosynthetic pathway C <sub>4</sub> | Specialised carbon storage organs    | Hemicryptophyte life form | Tussock growth form   | Perennial life span | Seed size length <2mm    |
| CYPESC  | <i>Cyperus esculentus</i> L.                    | Cyperaceae     | Photosynthetic pathway C <sub>4</sub> | Specialised carbon storage organs    | Hemicryptophyte life form | Erect growth form     | Perennial life span | Seed size length >10mm   |
| CYSPSP  | <i>Cyperus</i> spp. L.                          | Cyperaceae     | Photosynthetic pathway C <sub>4</sub> | Specialised carbon storage organs    | Hemicryptophyte life form | Erect growth form     | Perennial life span | Seed size length >10mm   |
| DAUCAR  | <i>Daucus carota</i> L.                         | Apiaceae       | Photosynthetic pathway C <sub>4</sub> | Specialised carbon storage organs    | Therophyte life form      | Erect growth form     | Biennial life span  | Seed size length 2- <4mm |
| ELECOR  | <i>Eleusine coracana</i> (L.) Gaertn.           | Poaceae        | Photosynthetic pathway C <sub>4</sub> | Specialised carbon storage organs    | Therophyte life form      | Erect growth form     | Annual life span    | Seed size length <2mm    |
| GALPAR  | <i>Galinsoga parviflora</i> Cav.                | Asteraceae     | Photosynthetic pathway C <sub>3</sub> | Specialised carbon storage organs    | Therophyte life form      | Erect growth form     | Annual life span    | Seed size length <2mm    |
| GISPHA  | <i>Gisekia pharnacioides</i> L.                 | Gisekiaceae    | Photosynthetic pathway C <sub>4</sub> | Specialised carbon storage organs    | Therophyte life form      | Prostrate growth form | Annual life span    | Seed size length <2mm    |

|        |                                                |                |                                       |                                      |                           |                       |                     |                         |
|--------|------------------------------------------------|----------------|---------------------------------------|--------------------------------------|---------------------------|-----------------------|---------------------|-------------------------|
| HIBNIG | <i>Hibiscus nigricaulis</i> Baker f.           | Malvaceae      | Photosynthetic pathway CAM            | No specialised carbon storage organs | Therophyte life form      | Erect growth form     | Annual life span    | Seed size length <2mm   |
| HIBTRI | <i>Hibiscus trionum</i> L.                     | Malvaceae      | Photosynthetic pathway C <sub>4</sub> | Specialised carbon storage organs    | Therophyte life form      | Erect growth form     | Annual life span    | Seed size length <2mm   |
| INDSPI | <i>Indigofera spicata</i> Forsk.               | Fabaceae       | Photosynthetic pathway C <sub>3</sub> | Specialised carbon storage organs    | Therophyte life form      | Creeper growth form   | Annual life span    | Seed size length <2mm   |
| IPOPUR | <i>Ipomoea purpurea</i> (L.) Roth              | Convolvulaceae | Photosynthetic pathway C <sub>3</sub> | Specialised carbon storage organs    | Therophyte life form      | Creeper growth form   | Annual life span    | Seed size length 4-10mm |
| LOBERI | <i>Lobelia erinus</i> L.                       | Campanulaceae  | Photosynthetic pathway C <sub>3</sub> | Specialised carbon storage organs    | Therophyte life form      | Erect growth form     | Perennial life span | Seed size length <2mm   |
| MEDPOL | <i>Medicago polymorpha</i> L.                  | Fabaceae       | Photosynthetic pathway C <sub>4</sub> | Specialised carbon storage organs    | Therophyte life form      | Prostrate growth form | Annual life span    | Seed size length 2-<4mm |
| ONCPIL | <i>Oncosiphon piluliferum</i> (L.f.) Källersjö | Asteraceae     | Photosynthetic pathway C <sub>4</sub> | Specialised carbon storage organs    | Hemicryptophyte life form | Erect growth form     | Annual life span    | Seed size length <2mm   |
| PLAVIR | <i>Plantago virginica</i> L.                   | Plantaginaceae | Photosynthetic pathway C <sub>3</sub> | Specialised carbon storage organs    | Therophyte life form      | Erect growth form     | Perennial life span | Seed size length 2-<4mm |
| POLAMA | <i>Polygala amatymbica</i> Eckl. & Zeyh.       | Polygalaceae   | Photosynthetic pathway C <sub>3</sub> | Specialised carbon storage organs    | Chamaephyte life form     | Erect growth form     | Perennial life span | Seed size length 4-10mm |
| POROLE | <i>Portulaca oleracea</i> L.                   | Portulacaceae  | Photosynthetic pathway C <sub>4</sub> | Specialised carbon storage organs    | Therophyte life form      | Prostrate growth form | Annual life span    | Seed size length 4-10mm |
| RORNUD | <i>Rorippa nudiuscula</i> Thell.               | Brassicaceae   | Photosynthetic pathway C <sub>4</sub> | Specialised carbon storage organs    | Therophyte life form      | Erect growth form     | Perennial life span | Seed size length <2mm   |
| SOLRET | <i>Solanum retroflexum</i> Dunal               | Solanaceae     | Photosynthetic pathway C <sub>3</sub> | Specialised carbon storage organs    | Phanerophyte life form    | Erect growth form     | Annual life span    | Seed size length 4-10mm |
| SOLRIG | <i>Solanum rigescens</i> Jacq.                 | Solanaceae     | Photosynthetic pathway C <sub>3</sub> | Specialised carbon storage organs    | Phanerophyte life form    | Erect growth form     | Annual life span    | Seed size length 4-10mm |
| SONASP | <i>Sonchus asper</i> (L.) Hill                 | Asteraceae     | Photosynthetic pathway C <sub>4</sub> | Specialised carbon storage organs    | Therophyte life form      | Rosette growth form   | Annual life span    | Seed size length 2-<4mm |
| SONNAN | <i>Sonchus nanus</i> Sond. ex Harv.            | Asteraceae     | Photosynthetic pathway C <sub>4</sub> | Specialised carbon storage organs    | Therophyte life form      | Rosette growth form   | Perennial life span | Seed size length 2-<4mm |
| TEPCAP | <i>Tephrosia capensis</i> (Jacq.) Pers.        | Fabaceae       | Photosynthetic pathway C <sub>3</sub> | Specialised carbon storage organs    | Chamaephyte life form     | Erect growth form     | Perennial life span | Seed size length <2mm   |
| TRIREF | <i>Trifolium repens</i> L.                     | Fabaceae       | Photosynthetic pathway C <sub>3</sub> | Specialised carbon storage organs    | Hemicryptophyte life form | Creeper growth form   | Perennial life span | Seed size length <2mm   |
| URTURE | <i>Urtica urens</i> L.                         | Urticaceae     | Photosynthetic pathway C <sub>3</sub> | Specialised carbon storage organs    | Therophyte life form      | Erect growth form     | Annual life span    | Seed size length <2mm   |
| XANSPI | <i>Xanthium spinosum</i> L.                    | Asteraceae     | Photosynthetic pathway C <sub>3</sub> | Specialised carbon storage organs    | Therophyte life form      | Erect growth form     | Annual life span    | Seed size length >10mm  |
| ZORCAP | <i>Zornia capensis</i> Pers.                   | Fabaceae       | Photosynthetic pathway C <sub>3</sub> | Specialised carbon storage organs    | Therophyte life form      | Creeper growth form   | Perennial life span | Seed size length 2-<4mm |

**Supplementary Table S2.** Description of plant functional traits.

| Plant functional traits                                                      | Description                                                                                                                                                                            |
|------------------------------------------------------------------------------|----------------------------------------------------------------------------------------------------------------------------------------------------------------------------------------|
| Growth form                                                                  | The form assumed by a plant in immediate response to the interaction of a particular environment on its genetic potentialities.                                                        |
| Annual life form                                                             | Plants that go from seed to seed in one year (they grow, mature, bloom, produce seed and die).                                                                                         |
| Perennial and biennial life form                                             | Plants that persist for several years, usually with new herbaceous growth from a part that survives from growing season to growing season.                                             |
| Monocotyledonous                                                             | Are grass and grass-like flowering plants, and the seeds of which typically contain only one embryonic leaf.                                                                           |
| Dicotyledonous                                                               | Flowering plants that have a pair of leaves, or cotyledons, in the embryo of the seed.                                                                                                 |
| Prostrate growing                                                            | It is a trait of plant that has branches spreading along the ground for most of its length but with tips turning upwards.                                                              |
| Erect growing                                                                | It is a trait where plants have stem growing vertically or upwards.                                                                                                                    |
| Nitrogen fixing                                                              | Plants whose roots are colonised by certain bacteria that extract nitrogen from the air and convert it into a form required for their growth.                                          |
| Non-nitrogen fixing                                                          | Plants that are not capable of transforming nitrogen into fixed nitrogen that is usable by plants.                                                                                     |
| Spinescent                                                                   | It is a plant trait that refers to the presence of any sharp pointed tip on any part of the plant including spines.                                                                    |
| Non-spinescent                                                               | It is a plant trait that refers to the absence of any sharp pointed tip on any part of the plant.                                                                                      |
| Assisted seed dispersal                                                      | It is a plant trait where seeds are aided by wind or other species to be transported over a long distance before being deposited.                                                      |
| Unassisted seed dispersal                                                    | It is a plant trait where seeds are not aided by wind or other species to be transported over a long distance before being deposited.                                                  |
| Specified flowering season                                                   | Plant trait that refers to the window of time when a flower naturally blooms in each locale.                                                                                           |
| Specialised carbon storage organs with C <sub>4</sub> photosynthetic pathway | It is a plant trait where C <sub>4</sub> plants minimise photorespiration by separating initial fixation and the Calvin cycle in space, performing these steps in different cell types |
| Specialised carbon storage organs with C <sub>3</sub> photosynthetic pathway | It is a plant trait where a plant does not have a photosynthetic adaptation to reduce photorespiration.                                                                                |

**Supplementary Table S3.** Dissimilarity in weed trait assemblages across maize field sites at  $p < 0.05$ .

| MF Sites                          | T     | P (perm) |
|-----------------------------------|-------|----------|
| MV vs BM                          | 3.417 | 0.001    |
| MV vs MJN                         | 2.135 | 0.002    |
| MV vs T                           | 3.025 | 0.001    |
| BM vs MJN                         | 2.001 | 0.004    |
| BM vs T                           | 1.541 | 0.057    |
| MJN vs T                          | 1.317 | 0.115    |
| Pre vs Post herbicide application | -     | 0.003    |

MF= Maize fields; MV= Baziya Makaula; MJN=Baziya Jojweni; BM= Baziya Mission;  $p$ -values in red indicate significant difference at  $p < 0.05$ .

**Supplementary Table S4.** List of species recorded for maize fields and margins in Baziya and Tsolo.

| Family           | Scientific Name                                                      | Common Name             | Growth form | Indigenous/Alien | Maize fields (MF) | Field margins (M) |
|------------------|----------------------------------------------------------------------|-------------------------|-------------|------------------|-------------------|-------------------|
| Amaranthaceae    | <i>Amaranthus viridis</i> L.                                         | Spiny pigweed           | Forb        | Alien            | Present           | Present           |
| Apiaceae         | <i>Daucus carota</i> L.                                              | Wild carrot             | Forb        | Alien            | Present           | Present           |
| Asparagaceae     | <i>Asparagus species</i> L.                                          | Asparagus               | Forb        | Indigenous       | Absent            | Present           |
| Asteraceae       | <i>Arctotheca calendula</i> K. Lewin                                 | Capeweed                | Forb        | Indigenous       | Present           | Present           |
| Asteraceae       | <i>Berkheya onopordifolia</i> (DC.) O. Hoffm. Ex                     | Purple berkheya         | Forb        | Indigenous       | Present           | Absent            |
| Asteraceae       | <i>Bidens bipinnata</i> L.                                           | Spanish needles         | Forb        | Alien            | Present           | Present           |
| Asteraceae       | <i>Bidens pilosa</i> L.                                              | Jersey cudweed          | Forb        | Alien            | Present           | Present           |
| Asteraceae       | <i>Cirsium vulgare</i> (Savi) Ten.                                   | Spear thistle           | Forb        | Alien            | Present           | Absent            |
| Asteraceae       | <i>Conyza bonariensis</i> (L.) Cronquist                             | Argentine fleabane      | Forb        | Alien            | Present           | Present           |
| Asteraceae       | <i>Cotula heterocarpa</i> DC.                                        | Water buttons           | Forb        | Indigenous       | Present           | Present           |
| Asteraceae       | <i>Galinsoga parviflora</i> Cav.                                     | Galant soldier          | Forb        | Alien            | Present           | Absent            |
| Asteraceae       | <i>Helichrysum asperum</i> (Thunb.) Hilliard & B.L. Burtt            | Hairy everlasting       | Forb        | Indigenous       | Present           | Present           |
| Asteraceae       | <i>Helichrysum gneseolanatum</i> Hilliard                            | Fluffy white            | Forb        | Indigenous       | Present           | Present           |
| Asteraceae       | <i>Oncosiphon piluliferum</i> (L.f.) Kallersjö                       | Pineapple weed          | Forb        | Indigenous       | Present           | Absent            |
| Asteraceae       | <i>Pseudognaphalium luteoalbum</i> (L.) Hilliard & B.L. Burtt        | Jersey cudweed          | Forb        | Indigenous       | Present           | Present           |
| Asteraceae       | <i>Sonchus asper</i> (L.) Hill                                       | Prickly sow-thistle     | Forb        | Alien            | Present           | Present           |
| Asteraceae       | <i>Sonchus nanus</i> Sond. ex Harv.                                  | Southistle              | Forb        | Alien            | Present           | Present           |
| Asteraceae       | <i>Tagetes minuta</i> L.                                             | Khaki weed              | Forb        | Alien            | Present           | Present           |
| Asteraceae       | <i>Xanthium spinosum</i> L.                                          | Spiny cocklebur         | Forb        | Alien            | Present           | Present           |
| Brassicaceae     | <i>Rorippa nudiscula</i> Thell.                                      | Yellowcresses           | Forb        | Alien            | Present           | Present           |
| Campanulaceae    | <i>Lobelia erinus</i> L.                                             | Garden lobelia          | Forb        | Indigenous       | Present           | Present           |
| Campanulaceae    | <i>Wahlenbergia stellarioides</i> Cham.                              | Tufted bluebell         | Forb        | Indigenous       | Present           | Present           |
| Chenopodiaceae   | <i>Chenopodium carinatum</i> R.Br.                                   | Keeled goosefoot        | Forb        | Alien            | Present           | Present           |
| Cleomaceae       | <i>Cleome monophylla</i> L.                                          | Rocky mountain beeplant | Forb        | Indigenous       | Present           | Absent            |
| Commelinaceae    | <i>Commelina benghalensis</i>                                        | Benghal dayflower       | Forb        | Alien            | Present           | Present           |
| Convolvulaceae   | <i>Ipomoea purpurea</i> (L.) Roth                                    | Common morning glory    | Forb        | Alien            | Present           | Present           |
| Convolvulaceae   | <i>Ipomoea spp.</i> L.                                               | Bindweed                | Forb        | Alien            | Present           | Absent            |
| Cucurbitaceae    | <i>Cucumis myriocarpus</i> Naudin                                    | Gooseberry cucumber     | Forb        | Indigenous       | Present           | Present           |
| Cunoniaceae      | <i>Callioma serratifolia</i> Andrews                                 | Black wattle            | Forb        | Alien            | Present           | Present           |
| Cyperaceae       | <i>Bulbostylis humilis</i> (Kunth) C.B. Clarke                       | Bushy heads grass       | Sedge       | Indigenous       | Present           | Absent            |
| Cyperaceae       | <i>Cyperus congestus</i> Vahl                                        | Nut grass               | Sedge       | Indigenous       | Present           | Absent            |
| Cyperaceae       | <i>Cyperus esculentus</i> L.                                         | Tigermat                | Sedge       | Indigenous       | Present           | Absent            |
| Cyperaceae       | <i>Cyperus spp.</i> L.                                               | Sedges                  | Sedge       | Indigenous       | Present           | Present           |
| Euphorbiaceae    | <i>Chamaesyce prostrata</i> (Aiton) Small                            | Green creeping spurge   | Forb        | Alien            | Present           | Present           |
| Euphorbiaceae    | <i>Ricinus communis</i> L.                                           | Castor bean             | Forb        | Alien            | Present           | Absent            |
| Fabaceae         | <i>Alysicarpus rugosus</i> (Willd.) DC.                              | Red moneywort           | Forb        | Indigenous       | Present           | Present           |
| Fabaceae         | <i>Chamaecrista biensis</i> (Steyart) Mendonca & Torre               | Locust weed             | Forb        | Indigenous       | Present           | Present           |
| Fabaceae         | <i>Indigofera spicata</i> Forsk.                                     | True indigo             | Forb        | Indigenous       | Present           | Absent            |
| Fabaceae         | <i>Lespedeza pilosa</i> (Thunb.) Siebold & Zucc.                     | Carlifonia bush clover  | Forb        | Alien            | Present           | Absent            |
| Fabaceae         | <i>Medicago polymorpha</i> L.                                        | California burclover    | Forb        | Indigenous       | Present           | Present           |
| Fabaceae         | <i>Tephrosia capensis</i> (Jacq.) Pers.                              | Tephrosia fern          | Forb        | Alien            | Present           | Present           |
| Fabaceae         | <i>Trifolium repens</i> L.                                           | White clover            | Forb        | Alien            | Present           | Present           |
| Fabaceae         | <i>Zornia capensis</i> Pers.                                         | Caterpillar bean        | Forb        | Indigenous       | Present           | Present           |
| Gisekiaceae      | <i>Gisekia pharmacoides</i> L.                                       | Sand herbage            | Forb        | Alien            | Present           | Present           |
| Hypoxidaceae     | <i>Hypoxis villosa</i> L.f.                                          | Golden winter star      | Forb        | Indigenous       | Present           | Present           |
| Indaceae         | <i>Anistea abyssinica</i> Pax                                        | Blue-eyed grass         | Forb        | Indigenous       | Present           | Absent            |
| Malvaceae        | <i>Hibiscus nigricaulis</i> Baker f.                                 | Wild stockrose          | Forb        | Indigenous       | Present           | Absent            |
| Malvaceae        | <i>Hibiscus trionum</i> L.                                           | Flower-of-an-hour       | Forb        | Indigenous       | Present           | Present           |
| Onagraceae       | <i>Oenothera parodiana</i> Munz                                      | Evening primrose        | Forb        | Alien            | Present           | Present           |
| Papaveraceae     | <i>Argemone mexicana</i> L.                                          | Mexican pinkly poppy    | Forb        | Alien            | Present           | Absent            |
| Papaveraceae     | <i>Papaver aculeatum</i> Thunb.                                      | Orange poppy            | Forb        | Indigenous       | Present           | Absent            |
| Plantaginaceae   | <i>Diclis reptans</i> Benth.                                         | Toadflax                | Forb        | Indigenous       | Present           | Present           |
| Plantaginaceae   | <i>Plantago virginica</i> L.                                         | Dwarf plantain          | Forb        | Alien            | Present           | Present           |
| Poaceae          | <i>Andropogon eucomis</i> Nees                                       | Snowflake grass         | Grass       | Indigenous       | Absent            | Present           |
| Poaceae          | <i>Arundinella nepalensis</i> var. <i>contracta</i> Ohwi             | Tambuki grass           | Grass       | Indigenous       | Absent            | Present           |
| Poaceae          | <i>Bracharia deflexa</i> (Schumach.) Robyns                          | Congo signal grass      | Grass       | Indigenous       | Absent            | Present           |
| Poaceae          | <i>Bracharia eruciformis</i> var. <i>divaricata</i> Basappa & Munir. | Velvet bushwillow       | Grass       | Indigenous       | Absent            | Present           |
| Poaceae          | <i>Bromus diandrus</i> Roth                                          | Great brome             | Grass       | Alien            | Present           | Absent            |
| Poaceae          | <i>Cynodon dactylon</i> (L.) Pers.                                   | Couch grass             | Grass       | Alien            | Present           | Present           |
| Poaceae          | <i>Digitaria argyrograptia</i> (Nees) Stapf                          | Silver finger grass     | Grass       | Indigenous       | Absent            | Present           |
| Poaceae          | <i>Echinochloa crus-galli</i> (L.) P. Beauv.                         | Cockspar grass          | Grass       | Alien            | Present           | Absent            |
| Poaceae          | <i>Eleusine coracana</i> (L.) Gaertn.                                | Goose grass             | Grass       | Indigenous       | Present           | Present           |
| Poaceae          | <i>Elionurus muticus</i> (Spreng.) Kuntze                            | Wire lemon grass        | Grass       | Indigenous       | Absent            | Present           |
| Poaceae          | <i>Enneapogon scaber</i> Lehm.                                       | Enneapogon              | Grass       | Alien            | Present           | Present           |
| Poaceae          | <i>Eragrostis curvula</i> (Schrad.) Nees                             | Love grass              | Grass       | Indigenous       | Present           | Absent            |
| Poaceae          | <i>Eragrostis plana</i> Nees                                         | Eragrostis              | Grass       | Indigenous       | Present           | Present           |
| Poaceae          | <i>Lolium perenne</i> L.                                             | Perennial ryegrass      | Grass       | Alien            | Absent            | Present           |
| Poaceae          | <i>Melinis repens</i> (Willd.) Zizka                                 | Rose Natal grass        | Grass       | Indigenous       | Absent            | Present           |
| Poaceae          | <i>Panicum ecklonii</i> Nees                                         | Bajiho                  | Grass       | Indigenous       | Absent            | Present           |
| Poaceae          | <i>Panicum natalense</i> Hochst.                                     | Natal buffalo grass     | Grass       | Indigenous       | Absent            | Present           |
| Poaceae          | <i>Panicum schinzii</i> Hack.                                        | Land grass              | Grass       | Indigenous       | Present           | Absent            |
| Poaceae          | <i>Paspalum dilatatum</i> Poir.                                      | Paspalum spp            | Grass       | Alien            | Present           | Absent            |
| Poaceae          | <i>Pennisetum thunbergii</i> Kunth                                   | Fountain grass          | Grass       | Indigenous       | Absent            | Present           |
| Poaceae          | <i>Sporobolus africanus</i> (Poir.) Robyns & Tournay                 | Rush grass              | Grass       | Indigenous       | Absent            | Present           |
| Poaceae          | <i>Nassella neesiana</i> (Trin. & Rupr.) Barkworth                   | Stipagrostis spp        | Grass       | Alien            | Present           | Absent            |
| Poaceae          | <i>Themedia triandra</i> Forssk.                                     | Red oat grass           | Grass       | Indigenous       | Present           | Present           |
| Poaceae          | <i>Urochloa panicoides</i> P. Beauv.                                 | Panic liverseed grass   | Grass       | Indigenous       | Present           | Present           |
| Polygalaceae     | <i>Polygala amatymbica</i> Eckl. & Zeyh.                             | Clump forming plant     | Forb        | Indigenous       | Present           | Absent            |
| Portulacaceae    | <i>Portulaca oleracea</i> L.                                         | Pigweed                 | Forb        | Alien            | Present           | Present           |
| Rubiaceae        | <i>Richardia brasiliensis</i> Gomes                                  | Tropical Mexican clover | Forb        | Alien            | Present           | Present           |
| Scrophulariaceae | <i>Jamesbrittenia aurantiaca</i> (Burch.) Hilliard                   | Terracotta gazania      | Forb        | Indigenous       | Absent            | Absent            |
| Solanaceae       | <i>Datura stramonium</i> L.                                          | Jimson weed             | Forb        | Alien            | Present           | Absent            |
| Solanaceae       | <i>Solanum retroflexum</i> Dunal                                     | Earleaf nightshade      | Forb        | Alien            | Present           | Present           |
| Solanaceae       | <i>Solanum rigescens</i> Jacq.                                       | Flannel weed            | Forb        | Alien            | Present           | Present           |
| Urticaceae       | <i>Urtica urens</i> L.                                               | Dwarf nettle            | Forb        | Alien            | Present           | Absent            |
| Verbenaceae      | <i>Chascanum hederaceum</i> (Sond.) Moldenke                         | White trumpets          | Forb        | Indigenous       | Present           | Present           |
| Verbenaceae      | <i>Verbena bonariensis</i> L.                                        | Tall verbena            | Forb        | Alien            | Present           | Present           |
| Zygophyllaceae   | <i>Trinbulus terrestris</i> L.                                       | Tack weed               | Forb        | Indigenous       | Present           | Absent            |
